# Supplementary material for: Upregulation of sialidase NEU3 in head and neck squamous cell carcinoma associated with lymph node metastasis
Source: PubMed Central journal article supplement — Cancer Sci. 2015 Oct 16;106(11):1544–53. doi: 10.1111/cas.12810 (PMC4714679; doi:10.1111/cas.12810), 2015-10-16
Supplement: CAS-106-00000000001544-s001.pdf [file CAS-106-00000000001544-s001.pdf]

## Supplementary Materials

Up-regulation of sialidase NEU3 in head and neck squamous cell carcinoma associated with lymph node metastasis

Kiyoto Shiga, Kohta Takahashi, Kengo Kato, Kazuto Matsuur, Shigeru Saijo, Setsuko Moriya, Masahiro Hosono, Taeko Miyagi

Supplementary Table 1. List of primer sequences used in this study

|         | Forward                | Reverse                |
|---------|------------------------|------------------------|
| NEU1    | TGAGAACGACTTCGGTCTGGTG | CCAGGAAACACCATCATCCTTG |
| NEU2    | TGAGCACGCAGAGCTGATTGTC | CACTGCAAAGGTGGACCACTC  |
| NEU3    | GACTGGTCATCCCTGCGTAT   | CACCTATGTGGGATCTCCAG   |
| NEU4    | CCGTCTTCCTCTTCTTCATCGC | CATTGCAGTAGAGGAAGCTGCC |
| GAPDH   | ACCACAGTCCATGCCATCAC   | TCCACCACCCTGTTGCTGTA   |
| MMP2    | ATGCCGCCTTTAACTGGAG    | GGGAAGCCAGGATCCATTTT   |
| MMP9    | GAGCTGTGCGTCTTCCCCTTC  | GGAATGATCTAAGCCCAGCGC  |
| MT1-MMP | TGCCATGCAGAAGTTTTACGG  | TCCTTCGAACATTGGCCTTG   |
| E-Cad   | TGCCCAGAAAATGAAAAAGG   | GTGTATGTGGCAATGCGTTC   |
| N-Cad   | ACAGTGGCCACCTACAAAGG   | CCGAGATGGGGTTGATAATG   |
